# Supplementary material for: Mosaic Epigenetic Dysregulation of Ectodermal Cells in Autism Spectrum Disorder
Source: PLOS journal article supplement (doi:10.1371/journal.pgen.1004402), 2014-05-29
Supplement: S3 (10.1371/journal.pgen.1004402.s003) [file journal.pgen.1004402.s003]

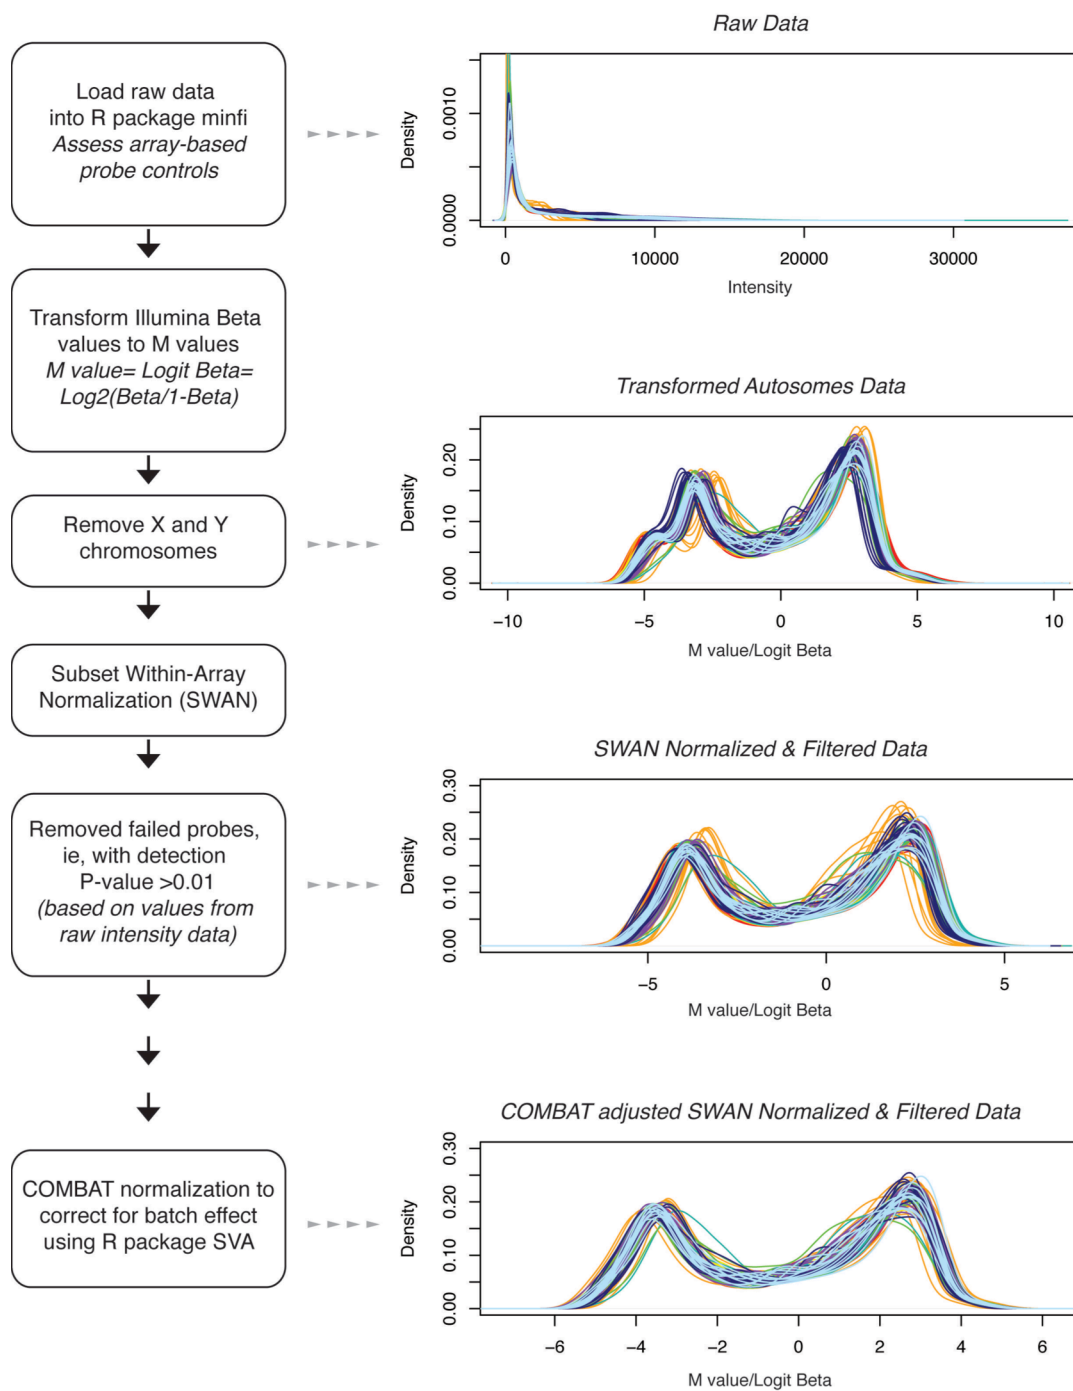

### Supplemental Figure S3: Preprocessing of Illumina 450K data

The colors in the density plots correspond to different chips (microarrays), each run to contain 12 samples. The normalization procedures correct for both intra-array and inter-array differences.
