# Supplementary material for: Mosaic Epigenetic Dysregulation of Ectodermal Cells in Autism Spectrum Disorder
Source: PLOS journal article supplement (doi:10.1371/journal.pgen.1004402), 2014-05-29
Supplement: S6 (10.1371/journal.pgen.1004402.s006) [file journal.pgen.1004402.s006]

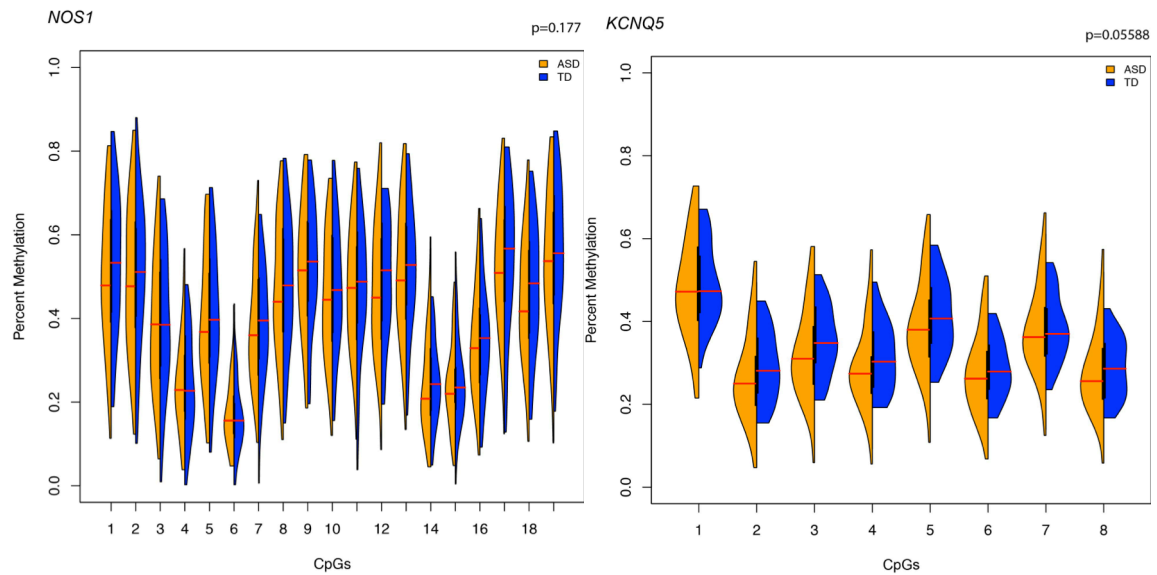

**Supplemental Figure S6:** Results of massively-parallel bisulphite sequencing of the *NOS1* and *KCNQ5* DMRs. The p values were calculated using t tests combining all of the loci tested in the putative DMR and comparing between the ASD and TD groups.
